# Supplementary material for: Fluorescence-enhanced bio-detection platforms obtained through controlled “step-by-step” clustering of silver nanoparticles
Source: Royal Society of Chemistry journal article supplement (doi:10.1039/c7nr07486g), 2017-12-15
Supplement: c7nr07486g1.pdf [file c7nr07486g1.pdf]

## Supporting Information

### Fluorescence-Enhanced Bio-Detection Platforms Obtained through Controlled "Layer-by-Layer" Anchoring of Silver Nanoparticles

Panpan Liu,<sup>a</sup> Ying Zhou,<sup>a</sup> Min Guo,<sup>a</sup> Shuguang Yang,<sup>b</sup> Olivier Félix,<sup>c</sup> David Martel,<sup>c</sup> Yiping Qiu,<sup>a,f</sup> Ying Ma<sup>\*a</sup> and Gero Decher<sup>\*c,d,e</sup>

- <sup>a.</sup> Key Laboratory of Textile Science and Technology of Ministry of Education, College of Textiles, Donghua University, Shanghai, 201620, P. R. China
- <sup>b.</sup> State Key Laboratory for Modification of Chemical Fibers and Polymer Materials, College of Material Science and Engineering, Donghua University, Shanghai, 201620, P. R. China
- <sup>c.</sup> CNRS Institut Charles Sadron, Strasbourg 67034, France
- <sup>d.</sup> Faculté de Chimie, Université de Strasbourg, Strasbourg 67008, France
- <sup>e.</sup> International Center for Frontier Research in Chemistry, Strasbourg 67083, France
- <sup>f.</sup> College of Textiles and Apparel, Quanzhou Normal University, Fujian 362000, P. R. China

\* To whom correspondence should be addressed:

E-mail: yingma@dhu.edu.cn

1. *Effect of the spray time on the deposition of Ag NPs.*

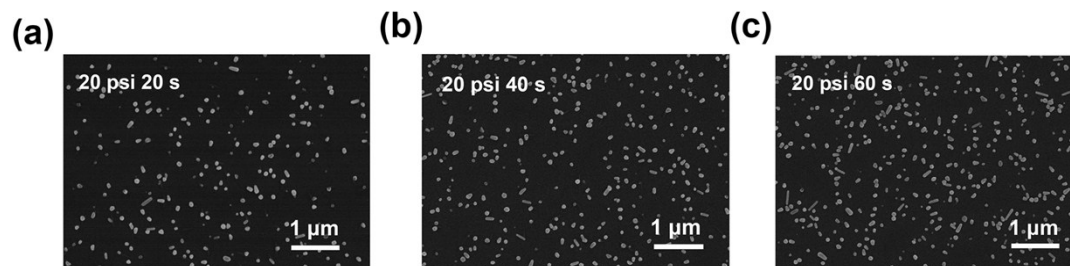

**Fig. S1.** SEM images of the one-time sprayed Ag platforms under 20 psi for (a) 20, (b) 40 and (c) 60 s.

2. *Effect of the spray pressure on the deposition of Ag NPs.*

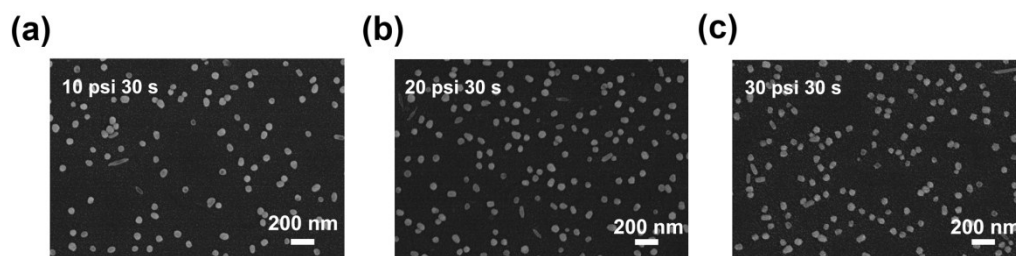

**Fig. S2.** SEM images of one-time sprayed Ag platforms under (a) 10, (b) 20 and (c) 30 psi for 30 s.

3. *Effect of the aggregation degree of the planar Ag clusters on the electric field enhancement.*

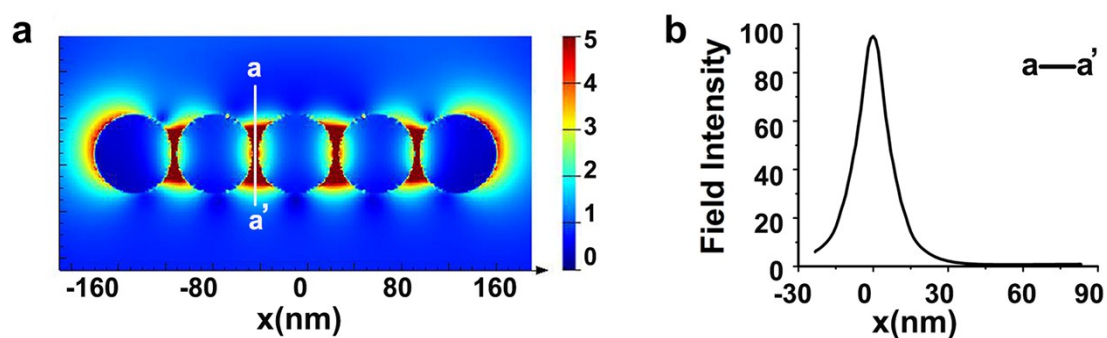

**Fig. S3.** Electric field density distribution simulated using FDTD and corresponding line plot of field enhancement in the gaps between two particles for the 5-aggregated planar Ag cluster (93.6).
